# Supplementary material
Source: PubMed Central journal article supplement (PMC6119143)
Supplement: 2017_185967-Disclosures_and_Contributions.pdf [file 2017_185967-Disclosures_and_Contributions.pdf]

Haematologica  
HAEMATOL/2017/185967  
Version 3

Fetal hemoglobin induction in sickle erythroid progenitors using a  
synthetic zinc finger DNA-binding domain

Biaoru Li, Xingguo Zhu, Mir A. Hossain, Cameron R. Guy, Hongyan Xu,  
Jörg Bungert, and Betty S. Pace

Disclosures: This work was funded through NIH grants: R01DK52356: Jorg Bungert  
R01HL069234: Betty Pace Training grant from the National Heart Lung and Blood Institute:  
HL117684: Xingguo Zhu Pre-doctoral fellowship from the American Heart Association:  
AHA 16PRE31290001: Mir Hossain

Contributions: BL, XZ, MH, CG and HX performed research and data analysis. JB and BP  
wrote the manuscript and supervised the study.
